# Supplementary material
Source: publisher figshare collection journal article supplement (https://tandf.figshare.com/articles/dataset/_/9976055)
Supplement: Supplementary file 1 [file 1]

Table S2. Intra and interspecific sequence divergence in the *rbc* L gene in the genus *Lophurella*.

|                         | <i>L. caespitosa</i> | <i>L. hookeriana</i> | <i>L. mutabilis</i> | <i>L. nigra</i> | <i>L. pauciramulosa</i> | <i>L. pericladus</i> | <i>L. tasmanica</i> |
|-------------------------|----------------------|----------------------|---------------------|-----------------|-------------------------|----------------------|---------------------|
| <i>L. caespitosa</i>    | -                    | 3.4                  | 2.8-3.1             | 2.6-2.7         | 3.2                     | 2.8-3.3              | 2.9                 |
| <i>L. hookeriana</i>    |                      | 0-0.6                | 2.1-3.2             | 2.5-3           | 1.9-2.3                 | 2.3-3.4              | 2.1-2.6             |
| <i>L. mutabilis</i>     |                      |                      | 0-0.9               | 1.9-2.5         | 2.4-2.7                 | 2.3-3                | 1.9-2.4             |
| <i>L. nigra</i>         |                      |                      |                     | 0-0.1           | 2.3                     | 2.1-2.4              | 1.9                 |
| <i>L. pauciramulosa</i> |                      |                      |                     |                 | 0                       | 2-2.1                | 1.8                 |
| <i>L. pericladus</i>    |                      |                      |                     |                 |                         | 0-0.8                | 1-1.1               |
| <i>L. tasmanica</i>     |                      |                      |                     |                 |                         |                      | -                   |
