# Supplementary material
Source: publisher figshare collection journal article supplement (https://tandf.figshare.com/articles/dataset/_/9976055)
Supplement: Supplementary file 3 [file 1]

Table S1. Collection information or publication and GenBank accession numbers of the sequences used in phylogenetic analyses.

|                                                         |                                                                                                                                | Specimen                    | Haplotype | GenBank<br>Accession<br>Number<br><i>rbc L</i> |
|---------------------------------------------------------|--------------------------------------------------------------------------------------------------------------------------------|-----------------------------|-----------|------------------------------------------------|
| Collection site, habitat, date & collectors / Reference |                                                                                                                                |                             |           |                                                |
|                                                         |                                                                                                                                | ASR202<br>(WELT<br>A033734) | -         | MN149978                                       |
| <i>Lophurella caespitosa</i>                            | Arthur's Nose, Wellington South coast, North Island, New Zealand; mid-intertidal; 21.vi.2017; WN                               |                             |           |                                                |
| <i>Lophurella hookeriana</i>                            | Yendegaia, Magellan Region, Southern Patagonian, Chile; subtidal (1 m); 22.x.2016; ECM                                         | Y1                          | H1        | MN149974                                       |
|                                                         | Yendegaia, Magellan Region, Southern Patagonian, Chile; subtidal (1 m); 22.x.2016; ECM                                         | Y2                          | H1        | MN149975                                       |
|                                                         | Falkland Islands / García-Soto & López-Bautista 2018                                                                           | -                           | H2        | MH388599                                       |
| <i>Lophurella pericladus</i>                            | Robe, Southern Australia / García-Soto & López-Bautista 2018                                                                   | -                           | H1        | KU564481                                       |
|                                                         | 13th beach, Victoria, Australia; intertidal; 9.xi.2014; tetrasporophyte; PD                                                    | PD772                       | H1        | MN150010                                       |
|                                                         | Galaneuse Reef, Victoria, Australia; intertidal; 6.xii.2014; female gametophyte; PD                                            | PD2915                      | H1        | MN150014                                       |
|                                                         | Queenscliff, Port Phillip Bay, Victoria, Australia; drift; 27.xi.2018; PD                                                      | PD4765                      | H2        | MN150013                                       |
|                                                         | Queenscliff, Port Phillip Bay, Victoria, Australia; on pontoons in the marina; 30.xi.2018; PD                                  | PD4787                      | H2        | MN150005                                       |
|                                                         | Queenscliff, Port Phillip Bay, Victoria, Australia; on pontoons in the marina; 30.xi.2018; PD                                  | PD4789                      | H2        | MN150009                                       |
|                                                         | Queenscliff, Port Phillip Bay, Victoria, Australia; on pontoons in the marina; 30.xi.2018; PD                                  | PD4790                      | H2        | MN150008                                       |
|                                                         | Queenscliff, Port Phillip Bay, Victoria, Australia; on pontoons in the marina; 30.xi.2018; PD                                  | PD4791                      | H2        | MN150007                                       |
|                                                         | Queenscliff, Port Phillip Bay, Victoria, Australia; on pontoons in the marina; 30.xi.2018; PD                                  | PD4792                      | H2        | MN150006                                       |
|                                                         | Pebbly Beach, Mallacoota, Victoria, Australia; intertidal; 9.xi.2016; PD, KD & HV                                              | PD2746                      | H1        | MN150012                                       |
|                                                         | Shipwreck Creek, Mallacoota, Victoria, Australia; intertidal; 13.xi.2016; male gametophyte; PD, KD & HV                        | PD2866                      | H1        | MN150011                                       |
| <i>Lophurella nigra</i> sp. nov.                        | Bastion Point, Mallacoota, Victoria, Australia; subtidal (1 m); 8.xi.2016; female gametophyte; PD, KD & HV                     | PD2730                      | H1        | MN149995                                       |
|                                                         | Bastion Point, Mallacoota, Victoria, Australia; subtidal (1 m); 8.xi.2016; tetrasporophyte and female gametophyte; PD, KD & HV | PD2736                      | H2        | MN149998                                       |
|                                                         | Pebbly Beach, Mallacoota, Victoria; intertidal; 9.xi.2016; tetrasporophyte; PD, KD & HV                                        | PD2741                      | H2        | MN150000                                       |
|                                                         | The Gardens, Tasmania, Australia; intertidal; 7.xi.2017; male gametophyte; PD & JFC                                            | PD3401                      | H2        | MN149999                                       |
|                                                         | Bicheno, Tasmania, Australia; intertidal; 9.xi.2017; PD & JFC                                                                  | PD3475                      | H2        | MN149997                                       |
|                                                         | Bicheno, Tasmania, Australia; intertidal; 9.xi.2017; PD & JFC                                                                  | PD3555                      | H2        | MN149996                                       |
| <i>Lophurella mutabilis</i> sp. nov.                    | Killarnei, Victoria, Australia; intertidal; 27.xii.2014; male gametophyte; PD                                                  | PD1111                      | H1        | MN149980                                       |
|                                                         | Hells Gates, Tasmania, Australia / Savoie & Saunders 2016                                                                      | GWS016008                   | H5        | KU564481                                       |
|                                                         | Falmouth, Tasmania, Australia / Bustamante et al. 2016, as <i>Womersleyella pacifica</i>                                       | CUK10968                    | H4        | KT825866                                       |
|                                                         | Blackmans Bay, Tasmania, Australia; intertidal; 30.x.2017; PD & JFC                                                            | PD3072                      | H2        | MN149993                                       |
|                                                         | Blackmans Bay, Tasmania, Australia; intertidal; 30.x.2017; tetrasporophyte; PD & JFC                                           | PD3075                      | H2        | MN149994                                       |
|                                                         | Blackmans Bay, Tasmania, Australia; intertidal; 30.x.2017; tetrasporophyte; PD & JFC                                           | PD3079                      | H2        | MN149992                                       |
|                                                         | Blackmans Bay, Tasmania, Australia; intertidal; 30.x.2017; female gametophyte; PD & JFC                                        | PD3093                      | H2        | MN149991                                       |

|                                          | Collection site, habitat, date & collectors / Reference                                      | Specimen          | Haplotype | GenBank<br>Accession<br>Number |
|------------------------------------------|----------------------------------------------------------------------------------------------|-------------------|-----------|--------------------------------|
|                                          | Tinderbox, Tasmania, Australia; subtidal (1 m); 31.x.2017; PD & JFC                          | PD3139            | H2        | MN149990                       |
|                                          | Tinderbox, Tasmania, Australia; subtidal (1 m); 31.x.2017; PD & JFC                          | PD3106            | H4        | MN149984                       |
|                                          | Southport, Tasmania, Australia; intertidal; 1.xi.2017; tetraspophyte; PD & JFC               | PD3164            | H4        | MN149983                       |
|                                          | Southport, Tasmania, Australia; intertidal; 1.xi.2017; tetraspophyte; PD & JFC               | PD3172            | H4        | MN149982                       |
|                                          | Binalong Bay, Tasmania, Australia; intertidal; 8.xi.2017; tetraspophyte; PD & JFC            | PD3411            | H4        | MN149986                       |
|                                          | Binalong Bay, Tasmania, Australia; intertidal; 8.xi.2017; PD & JFC                           | PD3423            | H4        | MN149987                       |
|                                          | Bicheno, Tasmania, Australia; intertidal; 9.xi.2017; tetrasporophyte; PD & JFC               | PD3478            | H4        | MN149989                       |
|                                          | Bicheno, Tasmania, Australia; intertidal; 9.xi.2017; tetrasporophyte; PD & JFC               | PD3483            | H4        | MN149988                       |
|                                          | Bicheno, Tasmania, Australia; intertidal; 9.xi.2017; female gametophyte; PD & JFC            | PD3457            | H3        | MN149981                       |
|                                          | The Gardens, Tasmania, Australia; intertidal; 7.xi.2017; PD & JFC                            | PD3376            | H4        | MN149985                       |
|                                          |                                                                                              | ASR85             |           |                                |
|                                          | East of Bishop, Stewart Island, New Zealand; low intertidal; 1.iv.2017; RD                   | (WELT<br>A033735) | H6        | MN149979                       |
|                                          |                                                                                              | ASR102            |           |                                |
| <i>Lophurella pauciramulosa</i> sp. nov. | East of Bishop, Stewart Island, New Zealand; subtidal (10 m); 1.iv.2017; RD                  | (WELT<br>A033736) | -         | MN150003                       |
|                                          |                                                                                              | ASR166            |           |                                |
|                                          | Green Island, South Island, New Zealand; subtidal (8 m); 31.v.2017; tetrasporophyte; RD & BT | (WELT<br>A033737) | -         | MN150002                       |
|                                          |                                                                                              | ASR175            |           |                                |
|                                          | Green Island, South Island, New Zealand; subtidal (2 m); 31.v.2017; tetrasporophyte; MD & AK | (WELT<br>A033738) | -         | MN150001                       |
| <i>Lophurella tasmanica</i> sp. nov.     | Port Arthur, Tasmania, Australia; intertidal; 13.xi.2017; tetraspophyte; PD & JFC            | PD3584            | -         | MN150004                       |
| Outgroup                                 |                                                                                              |                   |           |                                |
| <i>Echinothamnion hookeri</i>            | Wynyard, Tasmania, Australia; drift; 4.xi.2017; PD & JFC                                     | PD3272            | -         | MN149976                       |
| <i>Echinothamnion hystrix</i>            | Wynyard, Tasmania, Australia; drift; 4.xi.2017; PD & JFC                                     | PD3294            | -         | MN149977                       |

Collectors. BT: B. Twist; ECM: Erasmo Macaya; HV: Heroen Verbruggen; JFC: Joana F. Costa; KD: Kyatt Dixon; MD: M. Desmond; PD: P. Díaz-Tapia; RD: Roberta D'Archino; WN: Wendy Nelson

## References

- Bustamante, D.E., B.Y. Won & T.O. Cho. 2016. *Pterosiphonia spinifera* (Rhodomelaceae, Ceramiales) previously described as *P. arenosa* from Korea and reported as *P. pennata* from Peru. *Algae*, **31**: 105-115.
- Savoie, A.M. & Saunders, G.W. (2016). A molecular phylogenetic and DNA barcode assessment of the tribe Pterosiphonieae (Ceramiales, Rhodophyta) emphasizing the Northeast Pacific. *Botany*, **94**: 917-939.
